# Supplementary material for: Phylosymbiosis: Relationships and Functional Effects of Microbial Communities across Host Evolutionary History
Source: PLoS Biol. 2016 Nov 18;14(11):e2000225. doi: 10.1371/journal.pbio.2000225 (PMC5115861; doi:10.1371/journal.pbio.2000225)
Supplement: S1 Table — Models were generated using OTUs or abundance collapsed by bacterial taxonomy. Red boxes highlight the highest classification accuracy. Ten-fold cross validation assessed the percent classification accuracy for test sets excluded from model training. (XLSX) [file pbio.2000225.s005.xlsx]

## Sheet: Sheet 1 - Random Forest Results
Expected Predicted Error (EPE)		OTUs 99%	Genus	Family	Order	Class	Phylum
Meta Analysis	Mammal vs. Invertebrate	9.273	29.671	21.52	13.074	13.825	9.695
	Clade	107.282	116.841	65.844	37.941	19.23	3.187
	Species	7.509	5.667	3.766	3.216	2.866	1.716
Individual Clades	Drosophila	41.788	31.699	8.536	7.596	6.492	3.772
	Hominid	3.029	2.146	1.861	1.843	1.762	2.077
	Mosquito	177.804	558.912	93.132	21.141	10.571	2.195
	Nasonia	16.141	13.352	11.448	9.041	6.411	3.465
	Peromyscus	4.244	2.451	2.198	1.914	1.851	1.725
Percent Classification Accuracy		99 Percent OTUs	Genus	Family	Order	Class	Phylum
Meta Analysis	Mammal vs. Invertebrate	95.879	94.593	98.314	97.674	96.444	96.746
	Clade	98.462	98.973	97.906	96.45	95.121	76.676
	Species	77.727	75.528	67.809	62.093	56.96	37.585
Individual Clades	Drosophila	98.08	97.158	90.461	88.69	86.696	77.08
	Hominid	34.857	53.393	43.714	49.25	48	40.643
	Mosquito	99.531	99.844	99.063	95.938	91.875	60.871
	Nasonia	77.786	88.661	86.036	87.536	87.589	78.875
	Peromyscus	73.575	61.406	57.568	52.519	51.429	49.135

## Sheet: Sheet 2
% Classification Accuracy	OTUs 99%	Genus	Family	Order	Class	Phylum
Meta - Spine	95.879	94.593	98.314	97.674	96.444	96.746
Meta - Clade	98.462	98.973	97.906	96.45	95.121	76.676
Meta - Species
Drosophila	98.08	97.158	90.461	88.69	86.696	77.08
Hominid	34.857	53.393	43.714	49.25	48	40.643
Mosquito	99.531	99.844	99.063	95.938	91.875	60.871
Nasonia	77.786	88.661	86.036	87.536	87.589	78.875
Peromyscus	73.575	61.406	57.568	52.519	51.429	49.135
